# Supplementary material for: Fabry–Pérot interference-enhanced GaSe visible-blind UV photodetectors
Source: Royal Society of Chemistry journal article supplement (doi:10.1039/d5tc00139k), 2025-01-01
Supplement: d5tc00139k1.pdf [file d5tc00139k1.pdf]

## Supporting Information

### Fabry-Pérot interference enhanced GaSe Visible-blind UV Photodetectors

Li-Yan Liang,<sup>a</sup> Zi-Hao Guo,<sup>a</sup> Xin-Hui He,<sup>a</sup> Wei Shu,<sup>a</sup> Chun-Yan Wu,<sup>a,\*</sup> Shi-Rong  
Chen,<sup>a</sup> Ji-Gang Hu,<sup>b,\*</sup> Yu-Xue Zhou<sup>c</sup> and Lin-Bao Luo<sup>a</sup>

<sup>a</sup> School of Microelectronics, Hefei University of Technology, Hefei 230009, P. R. China

<sup>b</sup> School of Physics, Hefei University of Technology, Hefei, 230009, P. R. China

<sup>c</sup> College of Physical Science and Technology, Yangzhou University, Yangzhou 225002,  
P. R. China

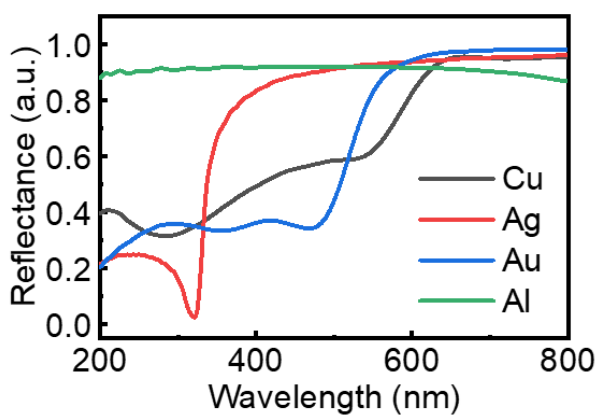

**Fig. S1** Simulated reflectance spectra of different metal films with a thickness of 80 nm.

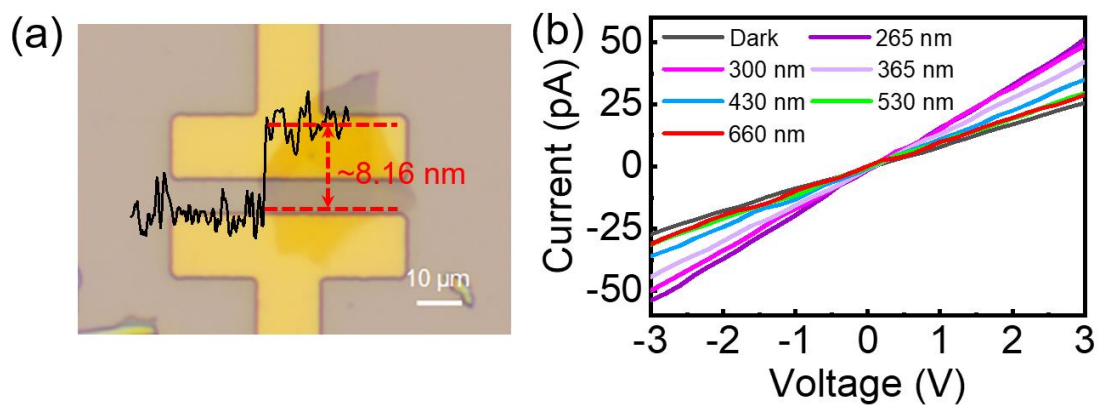

**Fig. S2** (a) Optical microscopy image of a typical GaSe-based photodetector without the asymmetric F-P structure and the height profile of GaSe nanosheet in the channel. (b)  $I$ - $V$  curves in the dark and upon illumination with varied wavelengths at light intensity of  $1\ \text{mW}/\text{cm}^2$ .

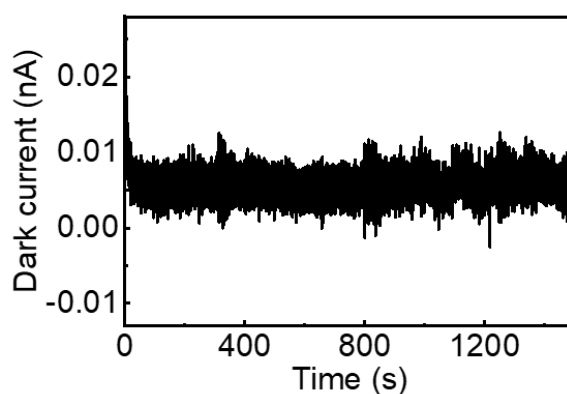

**Fig. S3** Dark current of the device.
